# Supplementary material for: A mini DNA–RNA hybrid origami nanobrick
Source: Royal Society of Chemistry journal article supplement (doi:10.1039/d1na00026h), 2021-01-01
Supplement: d1na00026h1.pdf [file d1na00026h1.pdf]

Supporting information

## A mini DNA-RNA hybrid origami nanobrick

Lifeng Zhou,<sup>a\*</sup> Arun Richard Chandrasekaran,<sup>a</sup> Mengwen Yan,<sup>b</sup> Vibhav A. Valsangkar,<sup>a,b</sup>  
Jeremy I. Feldblyum,<sup>b</sup> Jia Sheng,<sup>a,b</sup> Ken Halvorsen<sup>a\*</sup>

<sup>a</sup>The RNA Institute, University at Albany, State University of New York, Albany, NY USA

<sup>b</sup>Department of Chemistry, University at Albany, State University of New York, Albany, NY USA

Email: [lzhou2@albany.edu](mailto:lzhou2@albany.edu), [khalvorsen@albany.edu](mailto:khalvorsen@albany.edu)

### Methods and materials

***In vitro* transcription of RNA scaffold.** The RNA scaffold was obtained by *in vitro* transcription from a dsDNA template (Table S1), a gift from Dr. Prashanth Rangan's lab in at SUNY Albany. Briefly, 40 ng dsDNA template was used in the T7 *in vitro* transcription by following the instruction of HiScribe™ T7 High Yield RNA Synthesis Kit (New England BioLabs, inc., E2040S). Following the transcription, 1 μl DNase I (2,000 units/ml, New England BioLabs, Inc., M0303S) was added to digest the DNA templates and primers. The obtained RNA scaffold was purified using RNA Clean & Concentrator™-5 kit (Zymo Research, Inc.).

**Folding and purification of DNA-RNA hybrid origami nanostructures.** Each 10 μl reaction sample contained final concentrations of 50 nM RNA scaffold, 500 nM DNA staples strands, 0.5× Tris-EDTA buffer (5 mM Tris, 1 mM EDTA, pH 7.5) and different concentrations of NaCl (0-60 mM). Samples were incubated in a 12-hour thermal annealing protocol from 65 °C to 20 °C (Table S3) in a thermal cycler (Bio-Rad, C1000). After annealing, 10 μl of the sample was mixed with 1 μl of 10× GelRed to stain the nanostructures. Before loading the gel, 2 μl of 6× loading dye was added to the sample. Then, 10 μl of the prepared sample was loaded to each well in a 2.5% agarose gel that was run in 0.5× TBE buffer at 55 V for 2 h at 4 °C. The gel bands containing the folded nanostructures were excised and chopped into small pieces by stainless steel razor blade. Then the gel pieces were transferred to a Freeze 'N Squeeze DNA Gel Extraction Spin Column (Bio-RAD) and the nanostructures were extracted by spinning down at 13000 g for 5 min. The DNA-RNA hybrid duplexes were made using the same protocol of the origami nanostructures.

**Atomic force microscopy.** Purified nanostructures were imaged by an Asylum MFP-3D atomic force microscope with SNL-10 tip from Bruker. First, 2 μl of 2 mM aqueous NiCl<sub>2</sub> was dropped on freshly cleaved mica and incubated for ~1 min. Then 3 μl of 0.25 nM aqueous nanostructure was mixed with 3 μl of the 2 mM NiCl<sub>2</sub> solution and placed on the mica surface and incubated for about 10 min before scanning by the tip.

**Biostability assays.** For RNase H assay, DNA-RNA hybrid origami and duplex control structures were first mixed with 1× RNase H buffer (final) followed by the addition of various amounts of the enzyme. Samples were incubated at 37 °C. For testing in cell culture medium, we used Dulbecco's Modified Eagle's Medium (DMEM) with high glucose (Millipore Sigma, D6429) spiked with 5% FBS and 1% L-glutamine. Annealed structures were mixed with DMEM at 1% and 5% final concentrations in a 10 μl reaction.

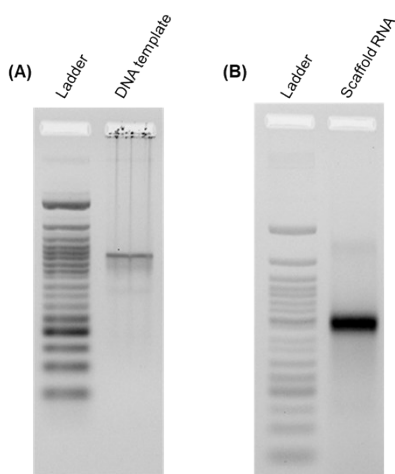

**Figure S1. RNA scaffold preparation.** (A) Gel image of the dsDNA template of the scaffold (2.5% agarose gel, 0.5× TBE buffer, 55 V for 1 h at room temperature). (B) Gel image of the in vitro transcribed RNA scaffold (2.5% agarose gel, 0.5x TBE buffer, 55 V for 2 h at 4 °C).

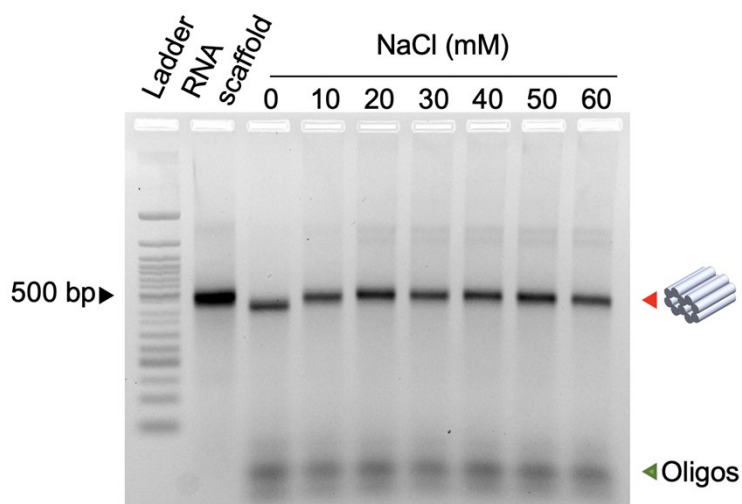

**Figure S2.** Agarose gel image of the nanostructure folded with different concentrations of NaCl. The red arrow indicates the bands corresponding to the folded origami structure and the green arrow indicates the excess DNA staples strands.

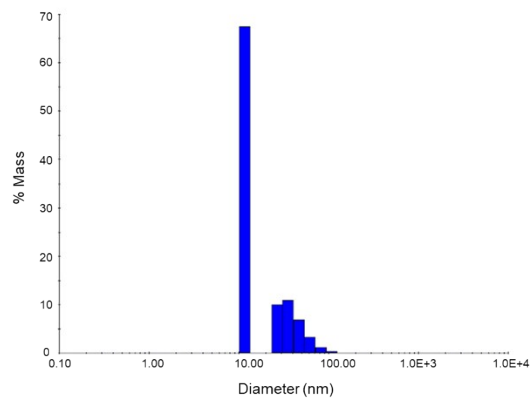

**Figure S3.** DLS test result of the diameter of the self-assembled origami nanostructures.

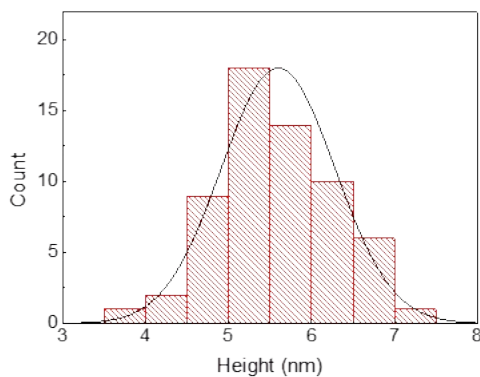

**Figure S4.** AFM analysis of origami nanobrick average height profiles over multiple assembled nanostructures.

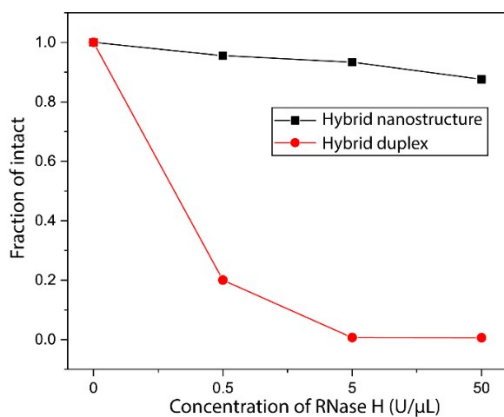

**Figure S5.** Analysis of the fraction of the undigested structures from the gel images shown in Figure 3A and 3B.

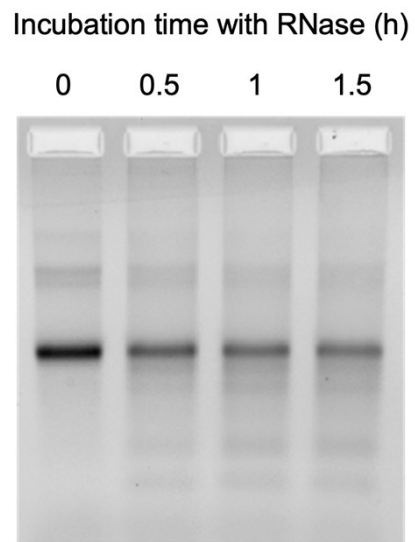

**Figure S6.** Full image of the RNase H digestion gel shown in Figure 3C.

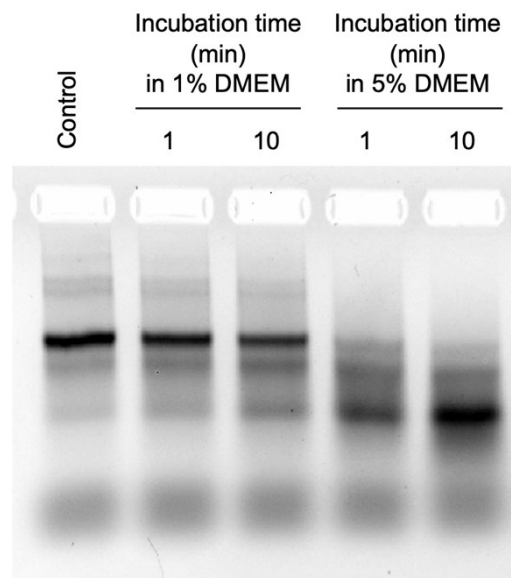

**Figure S7.** Stability of DNA-RNA hybrid origami in 1% DMEM cell culture media containing 5% FBS.

**Table S1.** Sequence of the RNA scaffold.

| Name         | Sequence (5' to 3')                                                                                                                                                                                                                                                                                                                                                                                                                                   | Length |
|--------------|-------------------------------------------------------------------------------------------------------------------------------------------------------------------------------------------------------------------------------------------------------------------------------------------------------------------------------------------------------------------------------------------------------------------------------------------------------|--------|
| RNA scaffold | CUGGACCUCCCAAAAGCCAACUUUUGUGAUUUUGUAAAUUUAGUUUUAG<br>CAGUUCGUUUUGCCACAUGAGUGGAACAUCGUGAAUGCACUUUUUGAUAAAGUGC<br>UCGGUUUUUUUUUUAUUUGUAACUACCAGCCUUCAGAGGCGAUCGUAUGCAUAG<br>UUUCUUGAAGUCAAUUUUGUCCGUGUAUUUCAAAUGUUUUGCUUUCGUGAAAACU<br>CGCAUUGUUUUUGUCACUCUACCAAGUAAUCAAUUUUGUACCAAUCAAUCGCAU<br>AUGGUUGUCCUAGAUCUAAAAAUGGCAAUAAUUUGCCUUCGGUAUUGCACCU<br>AAUGUAUUC AAGAACAAGUAGGGAAGCUCGAAAUUUCUCAAUACUUACCCA<br>AAAAAUAGAUAGAAAUAUAAUUUUCGAUUCGCAAUCGU | 401    |

**Table S2.** DNA staple strands used to fold the RNA scaffold.

| Name    | Sequence (5' to 3')                               | Length |
|---------|---------------------------------------------------|--------|
| Oligo1  | CACGATGCTTATCATGTTCTTGACAACC                      | 28     |
| Oligo2  | TATCACATCTATCTTAAGTAT                             | 21     |
| Oligo3  | GGGAGGTATTGCGAGCTTCCC                             | 21     |
| Oligo4  | TGCATACTGCGAGTATTACTT                             | 21     |
| Oligo5  | CAAATTGACATTTGGCGATTG                             | 21     |
| Oligo6  | ATATATTATAAGTTCATGTGGCAAACGAACAATATCAATACCTATTGCC | 49     |
| Oligo7  | AAAACAAGATCGCCGGTAGTTACTGCTATTACAAA               | 35     |
| Oligo8  | AAAGCAAACCTCAACCGAGCATTTCCACTGGCTTTT              | 35     |
| Oligo9  | TTGAGAATTAGGTGAAAATAAGAAACTA                      | 28     |
| Oligo10 | GGTAGAGATCAAATGAAGGATATTTGGGATTTTAT               | 35     |
| Oligo11 | ATTGGTAGATCTAGGAATACAATTTCGAATCGAAA               | 35     |
| Oligo12 | ATTTTTACAAATTGTTTCACG                             | 21     |

**Table S3.** PCR thermal annealing program for DNA-RNA hybrid nanostructure.

| Step | Temperature (°C) | Description | Time (min:sec) | Cycles | $\Delta T$ (°C) |
|------|------------------|-------------|----------------|--------|-----------------|
| 1    | 65               | Preheating  | 00:30          | -      | -               |
| 2    | 65               | Anneal      | 01:30          | 49 ×   | -0.1            |
| 3    | 60               | Anneal      | 01:30          | 99 ×   | -0.1            |
| 4    | 50               | Anneal      | 01:30          | 99 ×   | -0.1            |
| 5    | 40               | Anneal      | 01:30          | 99 ×   | -0.1            |
| 6    | 30               | Anneal      | 02:00          | 99 ×   | -0.1            |
| 7    | 20               | Anneal      | Pause          | -      | -               |

**Table S4.** Complementary DNA strands used to form the single DNA-RNA hybrid duplex.

| <b>Name</b>          | <b>Sequence (5' to 3')</b>                   | <b>Length</b> |
|----------------------|----------------------------------------------|---------------|
| RNA Scaffold_comp_1  | ATTTCTATCTATTTTTTGGGTAAGTATTTGAGAAATTTTCGAG  | 42            |
| RNA Scaffold_comp_2  | CTTCCCTACTTGTTCTTGAATACATTAGGTGCAATACCGAAG   | 42            |
| RNA Scaffold_comp_3  | GCAAATTATTGCCATTTTTAGATCTAGGACAACCATATGCGA   | 42            |
| RNA Scaffold_comp_4  | TTGATTGGTACAAATTGATTACTTGGTAGAGTGACAAAACAA   | 42            |
| RNA Scaffold_comp_5  | TGCGAGTTTTCACGAAAGCAAACATTTGAATACACGGACAAA   | 42            |
| RNA Scaffold_comp_6  | TTGACTTCAAGAACTATGCATACGATCGCCTCTGAAGGCTG    | 42            |
| RNA Scaffold_comp_7  | GTAGTTACAATATAAAATAACCGAGCACTTATCAAAAGTGCA   | 42            |
| RNA Scaffold_comp_8  | TTCACGATGTTCCACTCATGTGGCAAACGAACTGCTAAAAC    | 42            |
| RNA Scaffold_comp_9  | ATAATTTACAAATATCACAATAAGTTGGCTTTTGGGAGGTCCAG | 44            |
| RNA Scaffold_comp_10 | ACGATTGCGAATCGAAAATAT                        | 21            |
